1 **Structural and functional analysis of a potent sarbecovirus neutralizing antibody**

2

3 Dora Pinto<sup>1,7</sup>, Young-Jun Park<sup>2,7</sup>, Martina Beltramello<sup>1,7</sup>, Alexandra C. Walls<sup>2,7</sup>, M.  
4 Alejandra Tortorici<sup>2,3</sup>, Siro Bianchi<sup>1</sup>, Stefano Jaconi<sup>1</sup>, Katja Culap<sup>1</sup>, Fabrizia Zatta<sup>1</sup>,  
5 Anna De Marco<sup>1</sup>, Alessia Peter<sup>1</sup>, Barbara Guarino<sup>1</sup>, Roberto Spreafico<sup>4</sup>, Elisabetta  
6 Cameroni<sup>1</sup>, James Brett Case<sup>6</sup>, Rita E. Chen<sup>6</sup>, Colin Havenar-Daughton<sup>4</sup>, Gyorgy  
7 Snell<sup>4</sup>, Amalio Telenti<sup>4</sup>, Herbert W. Virgin<sup>4</sup>, Antonio Lanzavecchia<sup>1,5</sup>, Michael S.  
8 Diamond<sup>6</sup>, Katja Fink<sup>1</sup>, David Veessler<sup>2\*</sup> and Davide Corti<sup>1\*</sup>

9

10 <sup>1</sup> Humabs Biomed SA, a subsidiary of Vir Biotechnology, 6500 Bellinzona, Switzerland.

11 <sup>2</sup> Department of Biochemistry, University of Washington, Seattle, Washington 98195, USA.

12 <sup>3</sup> Institut Pasteur & CNRS UMR 3569, Unité de Virologie Structurale, 75015, Paris, France.

13 <sup>4</sup> Vir Biotechnology, San Francisco, California 94158, USA

14 <sup>5</sup> Institute for Research in Biomedicine, Università della Svizzera Italiana, 6500 Bellinzona,  
15 Switzerland.

16 <sup>6</sup> Departments of Medicine, Molecular Microbiology, Pathology & Immunology, Washington  
17 University School of Medicine, St. Louis, MO 631110, USA

18 <sup>7</sup> These authors contributed equally

19

20 Correspondence: [dveessler@uw.edu](mailto:dveessler@uw.edu), [dcorti@vir.bio](mailto:dcorti@vir.bio)

21

22

23 **SARS-CoV-2 is a newly emerged coronavirus responsible for the current COVID-**  
24 **19 pandemic that has resulted in more than one million infections and 73,000**  
25 **deaths<sup>1,2</sup>. Vaccine and therapeutic discovery efforts are paramount to curb the**  
26 **pandemic spread of this zoonotic virus. The SARS-CoV-2 spike (S) glycoprotein**  
27 **promotes entry into host cells and is the main target of neutralizing antibodies.**  
28 **Here we describe multiple monoclonal antibodies targeting SARS-CoV-2 S**  
29 **identified from memory B cells of a SARS survivor infected in 2003. One**  
30 **antibody, named S309, potently neutralizes SARS-CoV-2 and SARS-CoV**  
31 **pseudoviruses as well as authentic SARS-CoV-2 by engaging the S receptor-**  
32 **binding domain. Using cryo-electron microscopy and binding assays, we show**  
33 **that S309 recognizes a glycan-containing epitope that is conserved within the**  
34 **sarbecovirus subgenus, without competing with receptor attachment. Antibody**  
35 **cocktails including S309 along with other antibodies identified here further**  
36 **enhanced SARS-CoV-2 neutralization and may limit the emergence of**  
37 **neutralization-escape mutants. These results pave the way for using S309 and**  
38 **S309-containing antibody cocktails for prophylaxis in individuals at high risk of**  
39 **exposure or as a post-exposure therapy to limit or treat severe disease.**

40

41 Coronavirus entry into host cells is mediated by the transmembrane spike (S)  
42 glycoprotein that forms homotrimers protruding from the viral surface<sup>3</sup>. The S  
43 glycoprotein comprises two functional subunits: S<sub>1</sub> (divided into A, B, C and D domains)  
44 that is responsible for binding to host cell receptors and S<sub>2</sub> that promotes fusion of the  
45 viral and cellular membranes<sup>4,5</sup>. Both SARS-CoV-2 and SARS-CoV belong to the  
46 sarbecovirus subgenus and their S glycoproteins share 80% amino acid sequence  
47 identity<sup>6</sup>. SARS-CoV-2 S is closely related to the bat SARS-related CoV (SARSr-CoV)  
48 RaTG13 with which it shares 97.2% amino acid sequence identity<sup>1</sup>. We and others  
49 recently demonstrated that human angiotensin converting enzyme 2 (hACE2) is a  
50 functional receptor for SARS-CoV-2, as is the case for SARS-CoV<sup>1,6-8</sup>. The S domain  
51 B (S<sup>B</sup>) is the receptor binding domain (RBD) and binds to hACE2 with high-affinity,  
52 possibly contributing to the current rapid SARS-CoV-2 transmission in humans<sup>6,9</sup>, as  
53 previously proposed for SARS-CoV<sup>10</sup>.

54 As the coronavirus S glycoprotein mediates entry into host cells, it is the main  
55 target of neutralizing antibodies and the focus of therapeutic and vaccine design  
56 efforts<sup>3</sup>. The S trimers are extensively decorated with N-linked glycans that are  
57 important for protein folding<sup>11</sup> and modulate accessibility to host proteases and  
58 neutralizing antibodies<sup>12-15</sup>. Cryo-electron microscopy (cryoEM) structures of SARS-  
59 CoV-2 S in two distinct functional states<sup>6,9</sup> along with cryoEM and crystal structures of  
60 SARS-CoV-2 S<sup>B</sup> in complex with hACE2<sup>16-18</sup> revealed dynamic states of S<sup>B</sup> domains,  
61 providing a blueprint for the design of vaccines and inhibitors of viral entry.

62 Passive administration of monoclonal antibodies (mAbs) could have a major  
63 impact on controlling the SARS-CoV-2 pandemic by providing immediate protection,  
64 complementing the development of prophylactic vaccines. Accelerated development  
65 of mAbs in a pandemic setting could be reduced to 5-6 months compared to the  
66 traditional timeline of 10-12 months (Kelley B., Developing monoclonal antibodies at  
67 pandemic speed, Nat Biotechnol, in press). The recent finding that ansuvimab  
68 (mAb114) is a safe and effective treatment for symptomatic Ebola virus infection is a  
69 striking example of the successful use of mAb therapy during an infectious disease  
70 outbreak<sup>19,20</sup>. We previously isolated potentially neutralizing human mAbs from memory  
71 B cells of individuals infected with SARS-CoV<sup>21</sup> or MERS-CoV<sup>22</sup>. Passive transfer of  
72 these mAbs protected animals challenged with various SARS-CoV isolates and SARS-  
73 related CoV (SARSr-CoV)<sup>21,23,24</sup>, as well as with MERS-CoV<sup>22</sup>. Structural  
74 characterization of two of these mAbs in complex with SARS-CoV S and MERS-CoV

75 S provided molecular-level information on the mechanisms of viral neutralization<sup>14</sup>. In  
76 particular, while both mAbs blocked S<sup>B</sup> attachment to the host receptor, the SARS-  
77 CoV-neutralizing S230 mAb acted by functionally mimicking receptor-attachment and  
78 promoting S fusogenic conformational rearrangements<sup>14</sup>. Another mechanism of  
79 SARS-CoV neutralization was recently described for mAb CR3022, which bound a  
80 cryptic epitope only accessible when at least two out of the three S<sup>B</sup> domains of a S  
81 trimer were in the open conformation<sup>25,26</sup>. However, none of these mAbs neutralize  
82 SARS-CoV-2.

83

#### 84 **Identification of a potent SARS-CoV-2 neutralizing mAb from a SARS survivor**

85 We previously identified a set of human neutralizing mAbs from an individual  
86 infected with SARS-CoV in 2003 that potently inhibited both human and zoonotic  
87 SARS-CoV isolates<sup>21,23,27</sup>. To characterize the potential cross-reactivity of these  
88 antibodies with SARS-CoV-2, we performed a new memory B cell screening using  
89 peripheral blood mononuclear cells collected in 2013 from the same patient. We  
90 describe here nineteen mAbs from the initial screen (2004 blood draw)<sup>21,23</sup> and six  
91 mAbs from the new screen (2013 blood draw). The identified mAbs had a broad V  
92 gene usage and were not clonally related (**Table 1**). Eight out of the twenty five mAbs  
93 bound to SARS-CoV-2 S and SARS-CoV S transfected CHO cells with EC<sub>50</sub> values  
94 ranging between 1.4 and 6,100 ng/ml, and 0.8 and 254 ng/ml, respectively (**Fig. 1a-**  
95 **b**). MAbs were further evaluated for binding to the SARS-CoV-2 and SARS-CoV S<sup>B</sup>  
96 domains as well as to the prefusion-stabilized OC43 S<sup>28</sup>, MERS-CoV S<sup>29,30</sup>, SARS-  
97 CoV S<sup>30</sup> and SARS-CoV-2 S<sup>6</sup> ectodomain trimers. None of the mAbs studied bound to  
98 prefusion OC43 S or MERS-CoV S ectodomain trimers, indicating a lack of cross-  
99 reactivity outside the sarbecovirus subgenus (**Extended Data Fig.1**). MAbs S303,  
100 S304, S309 and S315 recognized the SARS-CoV-2 and SARS-CoV RBDs. In  
101 particular, S309 bound with nanomolar affinity to both S<sup>B</sup> domains, as determined by  
102 biolayer interferometry (**Fig. 1c-d, Extended Data Fig. 2**). Unexpectedly, S306 and  
103 S310 stained cells expressing SARS-CoV-2 S at higher levels than those expressing  
104 SARS-CoV S, yet it did not interact with SARS-CoV-2 or SARS-CoV S ectodomain  
105 trimers and RBD constructs by ELISA. These results suggest that they may recognize  
106 post-fusion SARS-CoV-2 S, which was recently proposed to be abundant on the  
107 surface of authentic SARS-CoV-2 viruses<sup>31</sup> (**Fig. 1a-b and Extended Data Fig.3**).

108 To evaluate the neutralization potency of the SARS-CoV-2 cross-reactive  
109 mAbs, we carried out pseudovirus neutralization assays using a murine leukemia virus  
110 (MLV) pseudotyping system<sup>32</sup>. S309 showed comparable neutralization potencies  
111 against both SARS-CoV and SARS-CoV-2 pseudoviruses, whereas S303 neutralized  
112 SARS-CoV-MLV but not SARS-CoV-2-MLV. S304 and S315 weakly neutralized  
113 SARS-CoV-MLV and SARS-CoV-2-MLV (**Extended Data Fig.4**). In addition, S309  
114 neutralized SARS-CoV-MLVs from isolates of the 3 phases of the 2002-2003 epidemic  
115 with IC<sub>50</sub> values comprised between 120 and 180 ng/ml and partially neutralized the  
116 SARS-CoV<sup>33</sup> WIV-1 (**Fig. 1e**). Finally, mAb S309 potently neutralized authentic  
117 SARS-CoV-2 (2019n-CoV/USA\_WA1/2020) with an IC<sub>50</sub> of 69 ng/ml (**Fig. 1f**).

118

### 119 **Structural basis of S309 cross-neutralization of SARS-CoV-2 and SARS-CoV**

120 To study the mechanisms of S309-mediated neutralization, we characterized  
121 the complex between the S309 Fab fragment and a prefusion stabilized SARS-CoV-2  
122 S ectodomain trimer<sup>6</sup> using single-particle cryoEM. Similar to our previous study of apo  
123 SARS-CoV-2 S<sup>6</sup>, 3D classification of the cryoEM data enabled identification of two  
124 structural states: a trimer with one S<sup>B</sup> domain open and a closed trimer. We determined  
125 3D reconstructions of the SARS-CoV-2 S ectodomain trimer with a single open S<sup>B</sup>  
126 domain and in a closed state (applying 3-fold symmetry), both with three S309 Fabs  
127 bound, at 3.7 Å and 3.3 Å resolution, respectively (**Fig. 2a-c, Extended Data Fig. 5**  
128 **and Table 2**). In parallel, we also determined a crystal structure of the S309 Fab at 3.3  
129 Å resolution to assist model building (**Table 3**). The S309 Fab bound to the open S<sup>B</sup>  
130 domain is weakly resolved in the cryoEM map, due to marked conformational variability  
131 of the upward pointing S<sup>B</sup> domain, and was not modeled in density. The analysis below  
132 is based on the closed state structure.

133 S309 recognizes a protein/glycan epitope on the SARS-CoV-2 S<sup>B</sup>, distinct from  
134 the receptor-binding motif. The epitope is accessible in both the open and closed S  
135 states, explaining the stoichiometric binding of Fab to the S trimer (**Fig. 2a-c**). The  
136 S309 paratope is composed of all six CDR loops that burie a surface area of ~1,050Å<sup>2</sup>  
137 at the interface with S<sup>B</sup> through electrostatic interactions and hydrophobic contacts.  
138 The 20-residue long CDRH3 sits atop the S<sup>B</sup> helix comprising residues 337-344 and  
139 also contacts the edge of the S<sup>B</sup> five-stranded β-sheet (residues 356-361), overall  
140 accounting for ~50% of the buried surface area (**Fig. 2d-e**). CDRL1 and CDRL2 extend  
141 the epitope by interacting with the helix spanning residues 440-444 that is located near

142 the S 3-fold molecular axis. CDRH3 and CDRL2 sandwich the SARS-CoV-2 S glycan  
143 at position N343 through contacts with the core fucose moiety (in agreement with the  
144 detection of SARS-CoV-2 N343 core-fucosylated peptides by mass-spectrometry<sup>34</sup>)  
145 and to a lesser extent with the core N-acetyl-glucosamine (Fig. 2d). These latter  
146 interactions bury an average surface of  $\sim 170 \text{ \AA}^2$  and stabilize the N343 oligosaccharide  
147 which is resolved to a much larger extent than in the apo SARS-CoV-2 S structures<sup>6,9</sup>.

148 The structural data explain the S309 cross-reactivity between SARS-CoV-2 and  
149 SARS-CoV as 19 out of 24 residues of the epitope are strictly conserved (**Fig. 2f** and  
150 **Extended Data Fig. 6a-b**). R346<sub>SARS-CoV-2</sub>, R357<sub>SARS-CoV-2</sub>, N354<sub>SARS-CoV-2</sub> and  
151 L441<sub>SARS-CoV-2</sub> are conservatively substituted to K333<sub>SARS-CoV</sub>, K344<sub>SARS-CoV</sub> (except for  
152 SARS-CoV isolate GZ02 where it is R444<sub>SARS-CoV</sub>), E341<sub>SARS-CoV</sub> and I428<sub>SARS-CoV</sub>  
153 whereas K444<sub>SARS-CoV-2</sub> is semi-conservatively substituted to T431<sub>SARS-CoV</sub>, in  
154 agreement with the comparable binding affinities to SARS-CoV and SARS-CoV-2 S  
155 (**Fig. 1c**). The oligosaccharide at position N343 is also conserved in both viruses and  
156 corresponds to SARS-CoV N330, for which we previously detected core-fucosylated  
157 glycopeptides by mass spectrometry<sup>14</sup> which would allow for similar interactions with  
158 the S309 Fab. Analysis of the S glycoprotein sequences of the 2,229 SARS-CoV-2  
159 isolates reported to date indicates that several mutations have occurred with variable  
160 frequency on the SARS-CoV-2 S ectodomain (**Extended Data Fig. 7a-b**) but no  
161 mutations arose within the epitope recognized by S309 mAb. Finally, S309 contact  
162 residues showed a high degree of conservation across clade 1, 2 and 3 sarbecovirus  
163 human and animal isolates<sup>35</sup> (**Extended Data Fig. 7c**). Collectively, the structural data  
164 indicate that S309 could neutralize all SARS-CoV-2 isolates circulating to date and  
165 possibly most other zoonotic sarbecoviruses.

166

### 167 **Mechanism of S309-mediated neutralization of SARS-CoV-2 and SARS-CoV**

168 The cryoEM structure of S309 bound to SARS-CoV-2 S presented here  
169 combined with the structures of SARS-CoV-2 S<sup>B</sup> and SARS-CoV S<sup>B</sup> in complex with  
170 ACE2<sup>16-18,36</sup> indicate that the Fab engages an epitope distinct from the receptor-binding  
171 motif and would not clash with ACE2 upon binding to S (**Figure 3a-b**). Biolayer  
172 interferometry analysis of S309 Fab or IgG binding to the SARS-CoV-2 S<sup>B</sup> domain or  
173 the S ectodomain trimer confirmed the absence of competition between the mAb and  
174 ACE2 for binding to SARS-CoV-2 S (**Figure 3c and Extended Data Fig. 8**).

175 To further investigate the mechanism of S309-mediated neutralization, we  
176 compared side-by-side transduction of SARS-CoV-2-MLV in the presence of either  
177 S309 Fab or S309 IgG. Both experiments yielded comparable IC<sub>50</sub> values (3.8 and 3.5  
178 nM, respectively), indicating similar potencies for IgG and Fab (**Fig. 3d**). However, The  
179 S309 IgG reached 100% neutralization, whereas the S309 Fab plateaued at ~80%  
180 neutralization (**Fig. 3d**). This result indicates that one or more IgG-specific bivalent  
181 mechanisms, such as S trimer cross-linking, steric hindrance or aggregation of  
182 virions<sup>37</sup>, may contribute to the ability to fully neutralize pseudovirions.

183 Fc-dependent effector mechanisms, such as NK-mediated antibody-dependent  
184 cell cytotoxicity (ADCC) and antibody-dependent cellular phagocytosis (ADCP) can  
185 contribute to viral control in infected individuals. We observed efficient S309- and  
186 S306-mediated ADCC of SARS-CoV-2 S-transfected cells, whereas the other mAbs  
187 tested showed limited or no activity (**Fig. 3e and Extended Data Fig. 9a**). These  
188 findings might be related to distinct binding orientations and/or positioning of the mAb  
189 Fc fragment relative to the FcγRIIIa receptors. ADCC was observed only using NK  
190 (effector) cells expressing the high-affinity FcγRIIIa variant (V158) but not the low-  
191 affinity variant (F158) (**Fig. 3e**). These results, which we confirmed using a FcγRIIIa  
192 cell reporter assay (**Fig. 3f**), suggest that S309 Fc engineering could potentially  
193 enhance activation of NK cells with the low-affinity FcγRIIIa variant (F158)<sup>38</sup>.  
194 Macrophage or dendritic cell-mediated ADCP can contribute to viral control by clearing  
195 virus and infected cells and by stimulating T cell response via presentation of viral  
196 antigens<sup>39,40</sup>. Similar to the ADCC results, mAbs S309 and S306 showed the strongest  
197 ADCP response (**Fig. 3g and Extended Data Fig. 8b**). FcγRIIIa signaling, however,  
198 was only observed for S309 (**Fig. 3h**). These findings suggest that ADCP by  
199 monocytes was dependent on both FcγRIIIa and FcγRIIa engagement. Collectively,  
200 these results demonstrate that in addition to potent *in vitro* neutralization, S309 may  
201 leverage additional protective mechanisms *in vivo*, as previously shown for other  
202 antiviral antibodies<sup>41,42</sup>.

203

## 204 **MAb cocktails enhance SARS-CoV-2 neutralization**

205 To gain more insight into the epitopes recognized by our panel of mAbs, we  
206 used structural information, escape mutants analysis<sup>23,27,30</sup>, and biolayer  
207 interferometry-based epitope binning to map the antigenic sites present on the SARS-

208 CoV and SARS-CoV-2 S<sup>B</sup> domains (**Fig. 4a and Extended Data Fig.10**). This analysis  
209 identified at least four antigenic sites within the S<sup>B</sup> domain of SARS-CoV targeted by  
210 our panel of mAbs. The receptor-binding motif, which is targeted by S230, S227 and  
211 S110, is termed site I. Sites II and III are defined by S315 and S124, respectively, and  
212 the two sites were bridged by mAb S304. Site IV is defined by S309, S109, and S303  
213 mAbs. Given the lower number of mAbs cross-reacting with SARS-CoV-2, we were  
214 able to identify sites IV targeted by S309 and S303, and site II-III targeted by S304 and  
215 S315 (**Fig. 4b**).

216         Based on the above findings, we evaluated the neutralization potency of the site  
217 IV S309 mAb in combination with either the site II S315 mAb or site II-III S304 mAb.  
218 Although S304 and S315 alone were weakly neutralizing, the combination of either of  
219 these mAbs with S309 resulted in an enhanced neutralization potency, compared to  
220 single mAbs, against both SARS-CoV-2-MLV and authentic SARS-CoV-2 (**Fig. 4c-d**  
221 and **Fig. 1e**). A synergistic effect between two non-competing anti-RBD mAbs has  
222 been already reported for SARS-CoV<sup>43</sup> and our data extend this observation to SARS-  
223 CoV-2, providing a proof-of-concept for the use of mAbs combinations to prevent or  
224 control SARS-CoV-2.

225         In summary, our study identifies S309 as a human mAb with broad neutralizing  
226 activity against multiple sarbecoviruses, including SARS-CoV-2, via recognition of a  
227 highly conserved epitope in the S<sup>B</sup> domain comprising the N343-glycan (N330 in  
228 SARS-CoV S). Furthermore, S309 can recruit effector mechanisms and synergizes  
229 with weakly neutralizing mAbs, which may mitigate the risk of viral escape. Our data  
230 indicate the potential to discover potently neutralizing pan-sarbecovirus mAbs,  
231 highlight antigenic sites to include in vaccine design, and pave the way to support  
232 preparedness for future sarbecovirus outbreaks. As S309 bears the promise to be an  
233 effective countermeasure to curtail the COVID-19 pandemic caused by SARS-CoV-2,  
234 Fc variants of S309 with increased half-life and effector functions have entered an  
235 accelerated development path towards clinical trials.

236

237

238

239

## 240 **ACKNOWLEDGEMENTS**

241 This study was supported by the National Institute of General Medical Sciences  
242 (R01GM120553, D.V.), the National Institute of Allergy and Infectious Diseases  
243 (HHSN272201700059C to DV and 75N93019C00062 to MSD)), a Pew Biomedical  
244 Scholars Award (D.V.), an Investigators in the Pathogenesis of Infectious Disease  
245 Award from the Burroughs Wellcome Fund (D.V.), the University of Washington Arnold  
246 and Mabel Beckman cryoEM center, the Pasteur Institute (M.A.T.) and the beamline  
247 5.0.1 at the Advanced Light Source at Lawrence Berkley National Laboratory. We  
248 gratefully acknowledge the authors, originating and submitting laboratories of the  
249 sequences from GISAID's EpiFlu™ Database upon which this research is based.

250

251

## 252 **AUTHOR CONTRIBUTIONS**

253 A.C.W., K.F., M.S.D., D.V. and D.C. designed the experiments. A.C.W., M.A.T., S.J.,  
254 E.C. expressed and purified the proteins. K.C., F.Z., S.J., E.C. sequenced and  
255 expressed antibodies. D.P., M.B., A.C.W. and S.B. performed binding assays. D.P.,  
256 M.B., A.C.W., A.P., A.D.M. carried out pseudovirus neutralization assays. J.B.C.,  
257 R.E.C. performed neutralization assays with authentic SARS-CoV-2. B.G. performed  
258 effector function assays. Y.J.P. prepared samples for cryoEM and collected the data.  
259 Y.J.P. and D.V. processed the data, built and refined the atomic models. A.C.W.  
260 crystallized the S309 Fab. Y.J.P. collected and processed the X-ray diffraction data  
261 and built and refined the atomic model. R.S., A.T. and G.S. performed bioinformatic  
262 and conservation analysis. A.L. provided key reagents. A.C.W., K.F., C.H.D., H.W.V.,  
263 A.L., D.V., D.C. analyzed the data and prepared the manuscript with input from all  
264 authors.

265

266

## 267 **DECLARATION OF INTERESTS**

268 D.P., S.B., K.C., E.C., C.H-D., G.S., M.B., A.K., K.F., A.P. F.Z., S.J., B.G., A.D.M., A.L.,  
269 A.T., H.W.V, R.S. and D.C. are employees of Vir Biotechnology Inc. and may hold  
270 shares in Vir Biotechnology Inc. M.S.D. is a consultant for Inbios, Eli Lilly, Vir  
271 Biotechnology, NGM Biopharmaceuticals, and Emergent BioSolutions and on the  
272 Scientific Advisory Board of Moderna. The Diamond laboratory at Washington



273 University School of Medicine has received sponsored research agreements from  
274 Moderna. The other authors declare no competing financial interests.

275

276

## 277 **MATERIALS AND METHODS**

278

### 279 **Ethics statement**

280 Donors provided written informed consent for the use of blood and blood components  
281 (such as sera), following approval by the Canton Ticino Ethics Committee, Switzerland.

282

### 283 **Antibody discovery and expression**

284 Monoclonal antibodies were isolated from EBV-immortalized memory B cells.  
285 Recombinant antibodies were expressed in ExpiCHO cells transiently co-transfected  
286 with plasmids expressing the heavy and light chain, as previously described<sup>44</sup>. Abs  
287 S303, S304, S306, S309, S310 and S315 were expressed as rIgG-LS antibodies. The  
288 LS mutation confers a longer half-life in vivo<sup>45</sup>. Antibodies S110 and S124 tested in  
289 Fig. 1 and Extended Data Fig. 1 were purified mAbs produced from immortalized B  
290 cells.

291

### 292 **Transient expression of recombinant SARS-CoV-2 protein and flow cytometry**

293 The full-length S gene of SARS-CoV-2 strain (SARS-CoV-2-S) isolate  
294 BetaCoV/Wuhan-Hu-1/2019 (accession number MN908947) was codon optimized for  
295 human cell expression and cloned into the pHCMV1 expression vector (Genlantis).  
296 Expi-CHO cells were transiently transfected with pHCMV1-SARS-CoV-2-S, SARS-  
297 spike\_pcDNA.3 (strain SARS) or empty pHCMV1 (Mock) using Expifectamine  
298 CHO Enhancer. Two days after transfection, cells were collected for immunostaining  
299 with mAbs. An Alexa647-labelled secondary antibody anti-human IgG Fc was used for  
300 detection. Binding of mAbs to transfected cells was analyzed by flow-cytometry using a  
301 ZE5 Cell Analyzer (Biorad) and FlowJo software (TreeStar). Positive binding was  
302 defined by differential staining of CoV-S-transfectants versus mock-transfectants.

303

### 304 **Affinity determination and competition experiments using Octet (BLI, biolayer 305 interferometry)**

306 KD determination of full-length antibodies: Protein A biosensors (Pall ForteBio) were  
307 used to immobilize recombinant antibodies at 2.7  $\mu\text{g/ml}$  for 1 min, after a hydration step  
308 for 10 min with Kinetics Buffer (KB; 0.01% endotoxin-free BSA, 0.002% Tween-20,  
309 0.005%  $\text{NaN}_3$  in PBS). Association curves were recorded for 5 minutes by incubating  
310 the mAb-coated sensors with different concentration of SARS-CoV RBD (Sino  
311 Biological) or SARS-CoV-2 RBD (produced in house; residues 331-550 of spike protein  
312 from BetaCoV/Wuhan-Hu-1/2019, accession number MN908947). The highest RBD  
313 concentration was 10  $\mu\text{g/ml}$ , then serially diluted 1:2.5. Dissociation was recorded for  
314 9 minutes by moving the sensors to wells containing KB. KD values were calculated  
315 using a global fit model (Octet). Octet Red96 (ForteBio) equipment was used.

316 KD determination of full-length antibodies compared to Fab: His-tagged RBD of SARS-  
317 CoV or SARS-CoV-2 were loaded at 3  $\mu\text{g/ml}$  in KB for 15 minutes onto anti-HIS (HIS2)  
318 biosensors (Molecular Devices, ForteBio). Association of mAb and Fab was performed  
319 in KB at 15  $\mu\text{g/ml}$  and 5  $\mu\text{g/ml}$  respectively for 5 minutes. Dissociation in KB was  
320 measured for 10 minutes.

321 MAbs competition experiments: His-tagged RBD of SARS-CoV or SARS-CoV-  
322 2 was loaded for 5 minutes at 3  $\mu\text{g/ml}$  in KB onto anti-Penta-HIS (HIS1K) biosensors  
323 (Molecular Devices, ForteBio). Association of mAbs was performed in KB at 15  $\mu\text{g/ml}$ .

324 ACE2 competition experiments: ACE2-His (Bio-Techne AG) was loaded for 30  
325 minutes at 5  $\mu\text{g/ml}$  in KB onto anti-HIS (HIS2) biosensors (Molecular Devices-  
326 ForteBio).

327 SARS-CoV RBD-rabbitFc or SARS-CoV-2 RBD-mouseFc (Sino Biological Europe  
328 GmbH) at 1  $\mu\text{g/ml}$  was associated for 15 minutes, after a preincubation with or without  
329 Ab (30  $\mu\text{g/ml}$ , 30 minutes). Dissociation was monitored for 5 minutes.

330

### 331 **ELISA**

332 The following proteins were coated on 96 well ELISA plates at the following  
333 concentrations: SARS-CoV RBD (Sino Biological, 40150-V08B1) at 1  $\mu\text{g/ml}$ , SARS-  
334 CoV-2 RBD (produced in house) at 10  $\mu\text{g/ml}$ , ectodomains (stabilized prefusion trimer)  
335 of SARS-CoV, SARS-CoV-2, OC43 and MERS, all at 1  $\mu\text{g/ml}$ . After blocking with 1%  
336 BSA in PBS, antibodies es were added to the plates in a concentration range between  
337 5 and 0.000028  $\mu\text{g/ml}$  and incubated for 1 h at RT. Plates were washed and secondary  
338 Ab Goat Anti Human IgG-AP (Southern Biotechnology: 2040-04) was added.

339 Substrate P-NitroPhenyl Phosphate (pNPP) (Sigma-Aldrich 71768) was used for  
340 colour development. OD405 was read on an ELx808IU plate reader (Biotek).

341

### 342 **Measurement of Fc-effector functions**

343 ADCC assays were performed using ExpiCHO-S cells transiently transfected with  
344 SARS-CoV or SARS-CoV-2 S as targets. Target cells were incubated with titrated  
345 concentrations of mAbs and after 10 minutes incubated with primary human NK cells  
346 as effector cells at an effector:target ratio of 9:1. NK cells were isolated from fresh  
347 blood of healthy donors using the MACSxpress NK Isolation Kit (Miltenyi Biotec, Cat.  
348 Nr.: 130-098-185). ADCC was measured using LDH release assay (Cytotoxicity  
349 Detection Kit (LDH) (Roche; Cat. Nr.: 11644793001) after 4 hours of incubation at  
350 37°C.

351 ADCP assays were performed using ExpiCHO-S target cells transiently transfected  
352 with SARS-CoV-2 S and fluorescently labeled with PKH67 Fluorescent Cell Linker Kits  
353 (Sigma Aldrich, Cat. Nr.: MINI67) as targets. Target cells were incubated with titrated  
354 concentrations of mAbs for 10 minutes, followed by incubation with human PBMCs  
355 isolated from healthy donors that were fluorescently labeled with Cell Trace Violet  
356 (Invitrogen, Cat. Nr.: C34557) at an effector:target ratio of 20:1. After an overnight  
357 incubation at 37°C, cells were stained with anti-human CD14-APC antibody (BD  
358 Pharmingen, Cat. Nr.: 561708, Clone M5E2) to stain monocytes. Antibody-mediated  
359 phagocytosis was determined by flow cytometry, gating on CD14<sup>+</sup> cells that were  
360 double positive for cell trace violet and PKH67.

361 Determination of mAb-dependent activation of human Fc $\gamma$ R1IIa or Fc $\gamma$ R1Ia was  
362 performed using ExpiCHO cells transiently transfected with SARS-CoV-2 S  
363 (BetaCoV/Wuhan-Hu-1/2019), incubated with titrated concentrations of mAbs for 10  
364 minutes. ExpiCHO cells then were incubated with Jurkat cells expressing Fc $\gamma$ R1IIa  
365 receptor or Fc $\gamma$ R1Ia on their surface and stably transfected with NFAT-driven luciferase  
366 gene (Promega, Cat. Nr.: G9798 and G7018) at an effector to target ratio of 6:1 for  
367 Fc $\gamma$ R1IIa and 5:1 for Fc $\gamma$ R1Ia. Activation of human Fc $\gamma$ Rs in this bioassay results in the  
368 NFAT-mediated expression of the luciferase reporter gene. Luminescence was  
369 measured after 21 hours of incubation at 37°C with 5% CO<sub>2</sub>, using the Bio-Glo-TM  
370 Luciferase Assay Reagent according to the manufacturer's instructions.

371

372 **Pseudovirus neutralization assays**

373 Murine leukemia virus (MLV)-based SARS-CoV S-pseudotyped viruses were prepared  
374 as previously described<sup>6,32</sup>. HEK293T cells were co-transfected with a SARS-CoV,  
375 SARS-CoV-2, CUHK, GZ02, or WiV1 S encoding-plasmid, an MLV Gag-Pol packaging  
376 construct and the MLV transfer vector encoding aluciferase reporter using the  
377 Lipofectamine 2000 transfection reagent (Life Technologies) according to the  
378 manufacturer's instructions. Cells were incubated for 5 hours at 37°C with 8% CO<sub>2</sub> with  
379 OPTIMEM transfection medium. DMEM containing 10% FBS was added for 72 hours.  
380 VeroE6 cells or DBT cells transfected with human ACE2 were cultured in DMEM  
381 containing 10% FBS, 1% PenStrep and plated into 96 well plates for 16-24 hours.  
382 Concentrated pseudovirus with or without serial dilution of antibodies was incubated  
383 for 1 hour and then added to the wells after washing 3X with DMEM. After 2-3 hours  
384 DMEM containing 20% FBS and 2% PenStrep was added to the cells for 48 hours.  
385 Following 48 hours of infection, One-Glo-EX (Promega) was added to the cells and  
386 incubated in the dark for 5-10 minutes prior to reading on a Varioskan LUX plate reader  
387 (ThermoFisher). Measurements were done in duplicate and relative luciferase units  
388 (RLU) were converted to percent neutralization and plotted with a non-linear regression  
389 curve fit in PRISM.

390

391 **Live virus neutralization assay**

392 SARS-CoV-2 strain 2019-nCoV/USA\_WA1/2020 was obtained from the Centers for  
393 Disease Control and Prevention (gift of Natalie Thornburg). Virus was passaged once  
394 in Vero CCL81 cells (ATCC) and titrated by focus-forming assay on Vero E6 cells.  
395 Serial dilutions of indicated mAbs were incubated with 10<sup>2</sup> focus forming units (FFU)  
396 of SARS-CoV-2 for 1 hour at 37°C. MAb-virus complexes were added to Vero E6 cell  
397 monolayers in 96-well plates and incubated at 37°C for 1 hour. Subsequently, cells  
398 were overlaid with 1% (w/v) methylcellulose in MEM supplemented with 2% FBS.  
399 Plates were harvested 30 hours later by removing overlays and fixed with 4% PFA in  
400 PBS for 20 minutes at room temperature. Plates were washed and sequentially  
401 incubated with 1 µg/mL of CR3022<sup>46</sup> anti-S antibody and HRP-conjugated goat anti-  
402 human IgG in PBS supplemented with 0.1% saponin and 0.1% BSA. SARS-CoV-2-  
403 infected cell foci were visualized using TrueBlue peroxidase substrate (KPL) and

404 quantitated on an ImmunoSpot microanalyzer (Cellular Technologies). Data were  
405 processed using Prism software (GraphPad Prism 8.0).

406

#### 407 **Recombinant Spike ectodomain production**

408 The SARS-CoV-2 2P S (Genbank: YP\_009724390.1) ectodomain was produced in  
409 500mL cultures of HEK293F cells grown in suspension using FreeStyle 293 expression  
410 medium (Life technologies) at 37°C in a humidified 8% CO<sub>2</sub> incubator rotating at 130  
411 r.p.m, as previously reported<sup>6</sup>. The culture was transfected using 293fectin  
412 (ThermoFisher Scientific) with cells grown to a density of 10<sup>6</sup> cells per mL and  
413 cultivated for three days. The supernatant was harvested and cells were resuspended  
414 for another three days, yielding two harvests. Clarified supernatants were purified  
415 using a 5mL Cobalt affinity column (Takara). Purified protein was filtered or  
416 concentrated and flash frozen in a buffer containing 50 mM Tris pH 8.0 and 150 mM  
417 NaCl prior to cryoEM analysis. The SARS-CoV S, HCoV-OC43 S and MERS-CoV S  
418 constructs were previously described<sup>14,28</sup> and produced similarly to SARS-CoV-2 2P  
419 S.

420

#### 421 **CryoEM sample preparation and data collection.**

422 3 µL of SARS-CoV-2 S at 1.6 mg/mL was mixed with 0.45 µL of S309 Fab at 7.4 mg/mL  
423 for 1 min at room temperature before application onto a freshly glow discharged 1.2/1.3  
424 UltraFoil grid (300 mesh). Plunge freezing used a vitrobot MarkIV (ThermoFisher  
425 Scientific) using a blot force of 0 and 6.5 second blot time at 100% humidity and 25°C.  
426 Data were acquired using the Legikon software<sup>47</sup> to control an FEI Titan Krios  
427 transmission electron microscope operated at 300 kV and equipped with a Gatan K2  
428 Summit direct detector and Gatan Quantum GIF energy filter, operated in zero-loss  
429 mode with a slit width of 20 eV. Automated data collection was carried out using  
430 Legikon at a nominal magnification of 130,000x with a pixel size of 0.525 Å with tilt  
431 angles ranging between 20° and 50°, as previously described<sup>48</sup>. The dose rate was  
432 adjusted to 8 counts/pixel/s, and each movie was acquired in super-resolution mode  
433 fractionated in 50 frames of 200 ms. 3,900 micrographs were collected in a single  
434 session with a defocus range comprised between 1.0 and 3.0 µm.

435

436

437

### 438 **CryoEM data processing**

439 Movie frame alignment, estimation of the microscope contrast-transfer function  
440 parameters, particle picking and extraction were carried out using Warp <sup>49</sup>. Particle  
441 images were extracted with a box size of 800 binned to 400 yielding a pixel size of 1.05  
442 Å. For each data set two rounds of reference-free 2D classification were performed  
443 using cryoSPARC <sup>50</sup> to select well-defined particle images. Subsequently, two rounds  
444 of 3D classification with 50 iterations each (angular sampling 7.5° for 25 iterations and  
445 1.8° with local search for 25 iterations), using our previously reported closed SARS-  
446 CoV-2 S structure<sup>6</sup> as initial model, were carried out using Relion <sup>51</sup> without imposing  
447 symmetry to separate distinct SARS-CoV-2 S conformations. 3D refinements were  
448 carried out using non-uniform refinement along with per-particle defocus refinement in  
449 cryoSPARC<sup>50</sup>. Particle images were subjected to Bayesian polishing <sup>52</sup> before  
450 performing another round of non-uniform refinement in cryoSPARC <sup>50</sup> followed by per-  
451 particle defocus refinement and again non-uniform refinement. Reported resolutions  
452 are based on the gold-standard Fourier shell correlation (FSC) of 0.143 criterion and  
453 Fourier shell correlation curves were corrected for the effects of soft masking by high-  
454 resolution noise substitution<sup>53</sup>.

455

### 456 **CryoEM model building and analysis.**

457 UCSF Chimera <sup>54</sup> and Coot were used to fit atomic models (PDB 6VXX and PDB  
458 6VYB) into the cryoEM maps. The Fab was subsequently manually built using  
459 Coot<sup>55,56</sup>. N-linked glycans were hand-built into the density where visible and the  
460 models were refined and relaxed using Rosetta<sup>57</sup>. Glycan refinement relied on a  
461 dedicated Rosetta protocol, which uses physically realistic geometries based on prior  
462 knowledge of saccharide chemical properties <sup>58</sup>, and was aided by using both  
463 sharpened and unsharpened maps. Models were analyzed using MolProbity <sup>59</sup>,  
464 EMringer <sup>60</sup>, Phenix <sup>61</sup> and privateer <sup>62</sup> to validate the stereochemistry of both the  
465 protein and glycan components. Figures were generated using UCSF ChimeraX <sup>63</sup>.

466

### 467 **Crystallization and X-ray structure determination of Fab S309**

468 Fab S309 crystals were grown in hanging drop set up with a mosquito at 20°C using  
469 150 nL protein solution in Tris HCl pH 8.0, 150 mM NaCl and 150nL mother liquor  
470 solution containing 1.1 M Sodium Malonate, 0.1 M HEPES, pH 7.0 and 0.5% (w/v)  
471 Jeffamine ED-2001. Crystals were cryo-protected using the mother liquor solution

472 supplemented with 30% glycerol. The dataset was collected at ALS beamline 5.0.2  
473 and processed to 3.3 Å resolution in space group P4<sub>1</sub>2<sub>1</sub>2 using mosflm<sup>64</sup> and  
474 Aimless<sup>65</sup>. The structure of Fab S309 was solved by molecular replacement using  
475 Phaser<sup>66</sup> and homology models as search models. The coordinates were improved  
476 and completed using Coot<sup>55</sup> and refined with REFMAC5<sup>67</sup>. Crystallographic data  
477 collection and refinement statistics are shown in Table 3.

478

### 479 **Sequence alignment**

480 SARS-CoV-2 genomics sequences were downloaded from GISAID on March  
481 29<sup>th</sup> 2020, using the “complete (>29,000 bp)” and “low coverage exclusion” filters. Bat  
482 and pangolin sequences were removed to yield human-only sequences. The spike  
483 ORF was localized by performing reference protein (YP\_009724390.1)-genome  
484 alignments with GeneWise2. Incomplete matches and indel-containing ORFs were  
485 rescued and included in downstream analysis. Nucleotide sequences were  
486 translated *in silico* using seqkit. Sequences with more than 10% undetermined  
487 aminoacids (due to N basecalls) were removed. Multiple sequence alignment was  
488 performed using MAFFT. Variants were determined by comparison of aligned  
489 sequences (n=2,229) to the reference sequence using the R/Bioconductor package  
490 Biostrings. A similar strategy was used to extract and translate spike protein  
491 sequences from SARS-CoV genomes sourced from ViPR (search criteria: SARS-  
492 related coronavirus, full-length genomes, human host, deposited before December  
493 2019 to exclude SARS-CoV-2, n=53). Sourced SARS-CoV genome sequences  
494 comprised all the major published strains, such as Urbani, Tor2, TW1, P2, Frankfurt1,  
495 among others. Pangolin sequences as shown by Tsan-Yuk Lam et al<sup>68</sup> were sourced  
496 from GISAID. Bat sequences from the three clades of sarbecoviruses as shown by Lu  
497 et al<sup>35</sup> were sourced from Genbank. Civet and racoon dog sequences were similarly  
498 sourced from Genbank.

499

500

501  
502

## References

- 503 1 Zhou, P. *et al.* A pneumonia outbreak associated with a new coronavirus of  
504 probable bat origin. *Nature*, doi:10.1038/s41586-020-2012-7 (2020).
- 505 2 Zhu, N. *et al.* A Novel Coronavirus from Patients with Pneumonia in China,  
506 2019. *N Engl J Med*, doi:10.1056/NEJMoa2001017 (2020).
- 507 3 Tortorici, M. A. & Veerler, D. Structural insights into coronavirus entry. *Adv Virus*  
508 *Res* **105**, 93-116, doi:10.1016/bs.aivir.2019.08.002 (2019).
- 509 4 Walls, A. C. *et al.* Cryo-electron microscopy structure of a coronavirus spike  
510 glycoprotein trimer. *Nature* **531**, 114-117, doi:10.1038/nature16988  
511 10.1038/nature16988. Epub 2016 Feb 8. (2016).
- 512 5 Walls, A. C. *et al.* Tectonic conformational changes of a coronavirus spike  
513 glycoprotein promote membrane fusion. *Proceedings of the National Academy*  
514 *of Sciences* **114**, 11157-11162, doi:10.1073/pnas.1708727114 (2017).
- 515 6 Walls, A. C. *et al.* Structure, function and antigenicity of the SARS-CoV-2 spike  
516 glycoprotein. *bioRxiv*, 2020.2002.2019.956581,  
517 doi:10.1101/2020.02.19.956581 (2020).
- 518 7 Hoffmann, M. *et al.* SARS-CoV-2 Cell Entry Depends on ACE2 and TMPRSS2  
519 and Is Blocked by a Clinically Proven Protease Inhibitor. *Cell*,  
520 doi:10.1016/j.cell.2020.02.052 (2020).
- 521 8 Letko, M., Marzi, A. & Munster, V. Functional assessment of cell entry and  
522 receptor usage for SARS-CoV-2 and other lineage B betacoronaviruses. *Nature*  
523 *Microbiology*, doi:10.1038/s41564-020-0688-y (2020).
- 524 9 Wrapp, D. *et al.* Cryo-EM structure of the 2019-nCoV spike in the prefusion  
525 conformation. *Science*, doi:10.1126/science.abb2507 (2020).
- 526 10 Li, W. *et al.* Receptor and viral determinants of SARS-coronavirus adaptation to  
527 human ACE2. *EMBO J* **24**, 1634-1643, doi:10.1038/sj.emboj.7600640  
528 10.1038/sj.emboj.7600640. Epub 2005 Mar 24. (2005).
- 529 11 Rossen, J. W. *et al.* The viral spike protein is not involved in the polarized sorting  
530 of coronaviruses in epithelial cells. *J Virol* **72**, 497-503 (1998).
- 531 12 Walls, A. C. *et al.* Glycan shield and epitope masking of a coronavirus spike  
532 protein observed by cryo-electron microscopy. *Nat Struct Mol Biol* **23**, 899-905,  
533 doi:10.1038/nsmb.3293  
534 10.1038/nsmb.3293. Epub 2016 Sep 12. (2016).
- 535 13 Xiong, X. *et al.* Glycan shield and fusion activation of a deltacoronavirus spike  
536 glycoprotein fine-tuned for enteric infections. *J Virol*, doi:10.1128/JVI.01628-17  
537 10.1128/JVI.01628-17. (2017).
- 538 14 Walls, A. C. *et al.* Unexpected Receptor Functional Mimicry Elucidates  
539 Activation of Coronavirus Fusion. *Cell* **176**, 1026-1039 e1015,  
540 doi:10.1016/j.cell.2018.12.028  
541 10.1016/j.cell.2018.12.028. Epub 2019 Jan 31. (2019).
- 542 15 Yang, Y. *et al.* Two Mutations Were Critical for Bat-to-Human Transmission of  
543 Middle East Respiratory Syndrome Coronavirus. *J Virol* **89**, 9119-9123,  
544 doi:10.1128/JVI.01279-15  
545 10.1128/JVI.01279-15. Epub 2015 Jun 10. (2015).
- 546 16 Yan, R. *et al.* Structural basis for the recognition of SARS-CoV-2 by full-length  
547 human ACE2. *Science* **367**, 1444-1448, doi:10.1126/science.abb2762 (2020).
- 548 17 Shang, J. *et al.* Structural basis of receptor recognition by SARS-CoV-2. *Nature*,  
549 doi:10.1038/s41586-020-2179-y (2020).



- 550 18 Lan, J. *et al.* Structure of the SARS-CoV-2 spike receptor-binding domain bound  
551 to the ACE2 receptor. *Nature*, doi:10.1038/s41586-020-2180-5 (2020).
- 552 19 Corti, D. *et al.* Protective monotherapy against lethal Ebola virus infection by a  
553 potentially neutralizing antibody. *Science* **351**, 1339-1342,  
554 doi:10.1126/science.aad5224 (2016).
- 555 20 Levine, M. M. Monoclonal Antibody Therapy for Ebola Virus Disease. *N Engl J*  
556 *Med* **381**, 2365-2366, doi:10.1056/NEJMe1915350 (2019).
- 557 21 Traggiai, E. *et al.* An efficient method to make human monoclonal antibodies  
558 from memory B cells: potent neutralization of SARS coronavirus. *Nat Med* **10**,  
559 871-875, doi:10.1038/nm1080  
560 10.1038/nm1080. Epub 2004 Jul 11. (2004).
- 561 22 Corti, D. *et al.* Prophylactic and postexposure efficacy of a potent human  
562 monoclonal antibody against MERS coronavirus. *Proc Natl Acad Sci U S A* **112**,  
563 10473-10478, doi:10.1073/pnas.1510199112  
564 10.1073/pnas.1510199112. Epub 2015 Jul 27. (2015).
- 565 23 Rockx, B. *et al.* Structural basis for potent cross-neutralizing human monoclonal  
566 antibody protection against lethal human and zoonotic severe acute respiratory  
567 syndrome coronavirus challenge. *J Virol* **82**, 3220-3235,  
568 doi:10.1128/JVI.02377-07  
569 10.1128/JVI.02377-07. Epub 2008 Jan 16. (2008).
- 570 24 Menachery, V. D. *et al.* SARS-like WIV1-CoV poised for human emergence.  
571 *Proc Natl Acad Sci U S A* **113**, 3048-3053, doi:10.1073/pnas.1517719113  
572 10.1073/pnas.1517719113. Epub 2016 Mar 14. (2016).
- 573 25 Yuan, M. *et al.* A highly conserved cryptic epitope in the receptor-binding  
574 domains of SARS-CoV-2 and SARS-CoV. *Science*,  
575 doi:10.1126/science.abb7269 (2020).
- 576 26 Joyce, M. G. *et al.* A Cryptic Site of Vulnerability on the Receptor Binding  
577 Domain of the SARS-CoV-2 Spike Glycoprotein. *bioRxiv*,  
578 2020.2003.2015.992883, doi:10.1101/2020.03.15.992883 (2020).
- 579 27 Rockx, B. *et al.* Escape from human monoclonal antibody neutralization affects  
580 in vitro and in vivo fitness of severe acute respiratory syndrome coronavirus. *J*  
581 *Infect Dis* **201**, 946-955, doi:10.1086/651022  
582 10.1086/651022. (2010).
- 583 28 Tortorici, M. A. *et al.* Structural basis for human coronavirus attachment to sialic  
584 acid receptors. *Nat Struct Mol Biol* **26**, 481-489, doi:10.1038/s41594-019-0233-  
585 y (2019).
- 586 29 Park, Y. J. *et al.* Structures of MERS-CoV spike glycoprotein in complex with  
587 sialoside attachment receptors. *Nat Struct Mol Biol* **26**, 1151-1157,  
588 doi:10.1038/s41594-019-0334-7 (2019).
- 589 30 Walls, A. C. *et al.* Unexpected Receptor Functional Mimicry Elucidates  
590 Activation of Coronavirus Fusion. *Cell* **176**, 1026-1039.e1015,  
591 doi:10.1016/j.cell.2018.12.028 (2019).
- 592 31 Liu, C. *et al.* Viral Architecture of SARS-CoV-2 with Post-Fusion Spike Revealed  
593 by Cryo-EM. *bioRxiv*, 2020.2003.2002.972927,  
594 doi:10.1101/2020.03.02.972927 (2020).
- 595 32 Millet, J. K. & Whittaker, G. R. Murine Leukemia Virus (MLV)-based Coronavirus  
596 Spike-pseudotyped Particle Production and Infection. *Bio Protoc* **6**,  
597 doi:10.21769/BioProtoc.2035  
598 10.21769/BioProtoc.2035. (2016).

- 599 33 Ge, X. Y. *et al.* Isolation and characterization of a bat SARS-like coronavirus  
600 that uses the ACE2 receptor. *Nature* **503**, 535-538, doi:10.1038/nature12711  
601 10.1038/nature12711. Epub 2013 Oct 30. (2013).
- 602 34 Watanabe, Y., Allen, J. D., Wrapp, D., McLellan, J. S. & Crispin, M. Site-specific  
603 analysis of the SARS-CoV-2 glycan shield. *bioRxiv*, 2020.2003.2026.010322,  
604 doi:10.1101/2020.03.26.010322 (2020).
- 605 35 Lu, R. *et al.* Genomic characterisation and epidemiology of 2019 novel  
606 coronavirus: implications for virus origins and receptor binding. *Lancet* **395**,  
607 565-574, doi:10.1016/S0140-6736(20)30251-8 (2020).
- 608 36 Li, F., Li, W., Farzan, M. & Harrison, S. C. Structure of SARS coronavirus spike  
609 receptor-binding domain complexed with receptor. *Science* **309**, 1864-1868,  
610 doi:10.1126/science.1116480 (2005).
- 611 37 Klasse, P. J. & Sattentau, Q. J. Occupancy and mechanism in antibody-  
612 mediated neutralization of animal viruses. *J Gen Virol* **83**, 2091-2108,  
613 doi:10.1099/0022-1317-83-9-2091 (2002).
- 614 38 Wang, X., Mathieu, M. & Brezski, R. J. IgG Fc engineering to modulate antibody  
615 effector functions. *Protein Cell* **9**, 63-73, doi:10.1007/s13238-017-0473-8  
616 (2018).
- 617 39 He, W. *et al.* Alveolar macrophages are critical for broadly-reactive antibody-  
618 mediated protection against influenza A virus in mice. *Nat Commun* **8**, 846,  
619 doi:10.1038/s41467-017-00928-3 (2017).
- 620 40 DiLillo, D. J. & Ravetch, J. V. Differential Fc-Receptor Engagement Drives an  
621 Anti-tumor Vaccinal Effect. *Cell* **161**, 1035-1045, doi:10.1016/j.cell.2015.04.016  
622 (2015).
- 623 41 Corti, D. *et al.* A neutralizing antibody selected from plasma cells that binds to  
624 group 1 and group 2 influenza A hemagglutinins. *Science* **333**, 850-856,  
625 doi:10.1126/science.1205669 (2011).
- 626 42 Hessel, A. J. *et al.* Fc receptor but not complement binding is important in  
627 antibody protection against HIV. *Nature* **449**, 101-104,  
628 doi:10.1038/nature06106 (2007).
- 629 43 ter Meulen, J. *et al.* Human monoclonal antibody combination against SARS  
630 coronavirus: synergy and coverage of escape mutants. *PLoS Med* **3**, e237,  
631 doi:10.1371/journal.pmed.0030237 (2006).
- 632 44 Stettler, K. *et al.* Specificity, cross-reactivity, and function of antibodies elicited  
633 by Zika virus infection. *Science* **353**, 823-826, doi:10.1126/science.aaf8505  
634 (2016).
- 635 45 Zalevsky, J. *et al.* Enhanced antibody half-life improves in vivo activity. *Nat*  
636 *Biotechnol* **28**, 157-159, doi:10.1038/nbt.1601 (2010).
- 637 46 Tian, X. *et al.* Potent binding of 2019 novel coronavirus spike protein by a SARS  
638 coronavirus-specific human monoclonal antibody. *Emerg Microbes Infect* **9**,  
639 382-385, doi:10.1080/22221751.2020.1729069 (2020).
- 640 47 Suloway, C. *et al.* Automated molecular microscopy: the new Legimon system.  
641 *Journal of structural biology* **151**, 41-60, doi:10.1016/j.jsb.2005.03.010 (2005).
- 642 48 Tan, Y. Z. *et al.* Addressing preferred specimen orientation in single-particle  
643 cryo-EM through tilting. *Nat Methods* **14**, 793-796, doi:10.1038/nmeth.4347  
644 (2017).
- 645 49 Tegunov, D. & Cramer, P. Real-time cryo-electron microscopy data  
646 preprocessing with Warp. *Nature methods*, doi:10.1038/s41592-019-0580-y  
647 (2019).

- 648 50 Punjani, A., Rubinstein, J. L., Fleet, D. J. & Brubaker, M. A. cryoSPARC:  
649 algorithms for rapid unsupervised cryo-EM structure determination. *Nature*  
650 *methods* **14**, 290-296, doi:10.1038/nmeth.4169 (2017).
- 651 51 Zivanov, J. *et al.* New tools for automated high-resolution cryo-EM structure  
652 determination in RELION-3. *Elife* **7**, doi:10.7554/eLife.42166  
653 10.7554/eLife.42166. (2018).
- 654 52 Zivanov, J., Nakane, T. & Scheres, S. H. W. A Bayesian approach to beam-  
655 induced motion correction in cryo-EM single-particle analysis. *IUCrJ* **6**,  
656 doi:doi:10.1107/S205225251801463X (2019).
- 657 53 Scheres, S. H. & Chen, S. Prevention of overfitting in cryo-EM structure  
658 determination. *Nature methods* **9**, 853-854, doi:10.1038/nmeth.2115 (2012).
- 659 54 Goddard, T. D., Huang, C. C. & Ferrin, T. E. Visualizing density maps with UCSF  
660 Chimera. *Journal of structural biology* **157**, 281-287,  
661 doi:10.1016/j.jsb.2006.06.010 (2007).
- 662 55 Emsley, P., Lohkamp, B., Scott, W. G. & Cowtan, K. Features and development  
663 of Coot. *Acta Crystallogr D Biol Crystallogr* **66**, 486-501,  
664 doi:10.1107/S0907444910007493 (2010).
- 665 56 Brown, A. *et al.* Tools for macromolecular model building and refinement into  
666 electron cryo-microscopy reconstructions. *Acta Crystallogr D Biol Crystallogr*  
667 **71**, 136-153, doi:10.1107/S1399004714021683 (2015).
- 668 57 Wang, R. Y. *et al.* Automated structure refinement of macromolecular  
669 assemblies from cryo-EM maps using Rosetta. *eLife* **5**, doi:10.7554/eLife.17219  
670 (2016).
- 671 58 Frenz, B. D. R., S.; Borst A.J.; Walls, A.C.; Adolf-Bryfogle, J.; Schief, W.R.;  
672 Veessler, D.; DiMaio, F. Automatically fixing errors in glycoprotein structures with  
673 Rosetta. *Structure* **27**, 1-6, doi:<https://doi.org/10.1016/j.str.2018.09.006> (2019).
- 674 59 Chen, V. B. *et al.* MolProbity: all-atom structure validation for macromolecular  
675 crystallography. *Acta Crystallogr D Biol Crystallogr* **66**, 12-21,  
676 doi:10.1107/S0907444909042073 (2010).
- 677 60 Barad, B. A. *et al.* EMRinger: side chain-directed model and map validation for  
678 3D cryo-electron microscopy. *Nat Methods* **12**, 943-946,  
679 doi:10.1038/nmeth.3541  
680 10.1038/nmeth.3541. Epub 2015 Aug 17. (2015).
- 681 61 Liebschner, D. *et al.* Macromolecular structure determination using X-rays,  
682 neutrons and electrons: recent developments in Phenix. *Acta Crystallogr D*  
683 *Struct Biol* **75**, 861-877, doi:10.1107/S2059798319011471 (2019).
- 684 62 Agirre, J. *et al.* Privateer: software for the conformational validation of  
685 carbohydrate structures. *Nature structural & molecular biology* **22**, 833-834,  
686 doi:10.1038/nsmb.3115 (2015).
- 687 63 Goddard, T. D. *et al.* UCSF ChimeraX: Meeting modern challenges in  
688 visualization and analysis. *Protein Sci* **27**, 14-25, doi:10.1002/pro.3235 (2018).
- 689 64 Battye, T. G., Kontogiannis, L., Johnson, O., Powell, H. R. & Leslie, A. G.  
690 iMOSFLM: a new graphical interface for diffraction-image processing with  
691 MOSFLM. *Acta Crystallogr D Biol Crystallogr* **67**, 271-281,  
692 doi:10.1107/S0907444910048675 (2011).
- 693 65 Evans, P. R. & Murshudov, G. N. How good are my data and what is the  
694 resolution? *Acta Crystallogr D Biol Crystallogr* **69**, 1204-1214,  
695 doi:10.1107/S0907444913000061 (2013).
- 696 66 McCoy, A. J. *et al.* Phaser crystallographic software. *J Appl Crystallogr* **40**, 658-  
697 674, doi:10.1107/S0021889807021206 (2007).

- 698 67 Murshudov, G. N. *et al.* REFMAC5 for the refinement of macromolecular crystal  
699 structures. *Acta Crystallogr D Biol Crystallogr* **67**, 355-367,  
700 doi:10.1107/S0907444911001314 (2011).
- 701 68 Lam, T. T. *et al.* Identifying SARS-CoV-2 related coronaviruses in Malayan  
702 pangolins. *Nature*, doi:10.1038/s41586-020-2169-0 (2020).  
703

**Figure 1**

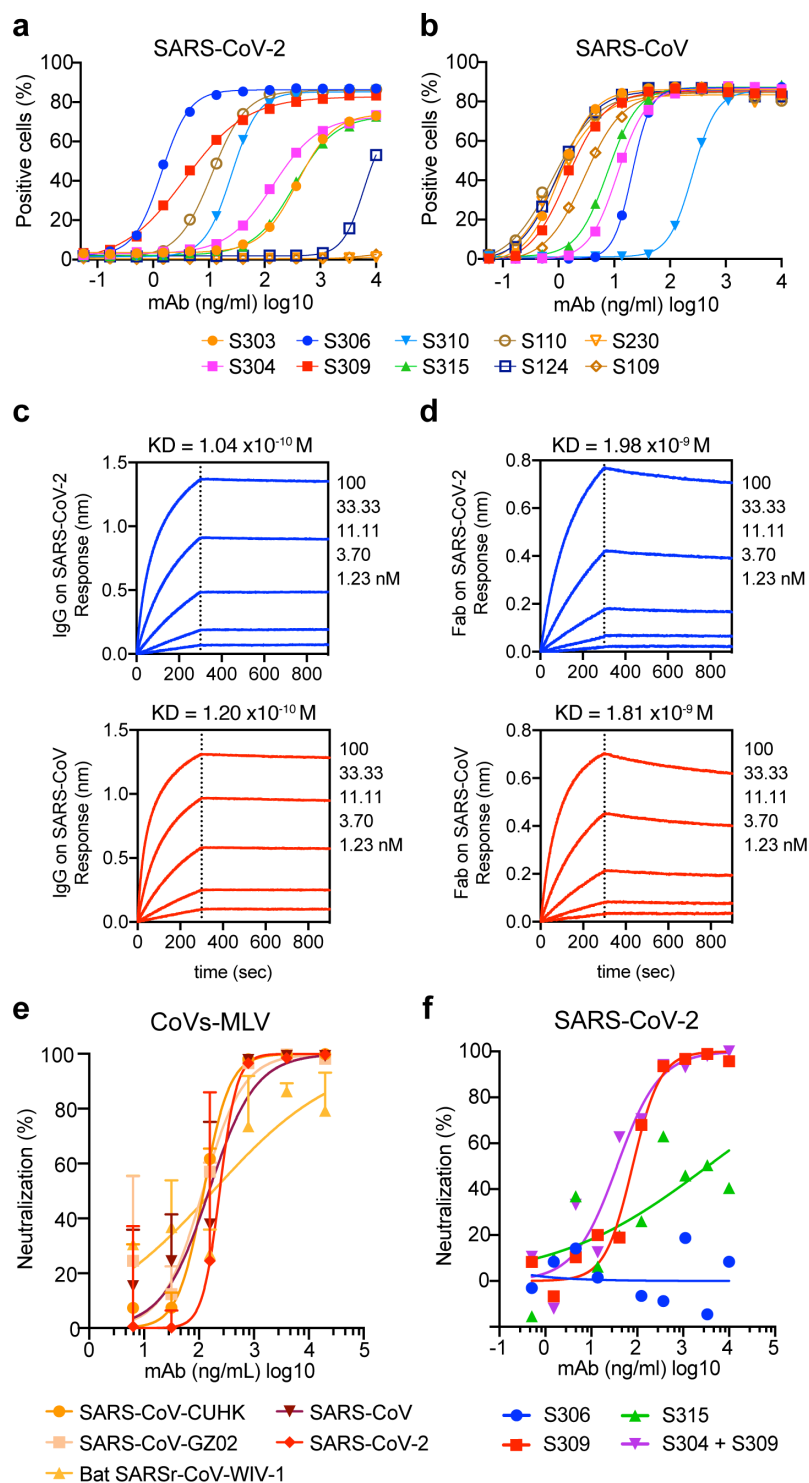

**Figure 1: Identification of a potent SARS-CoV-2 neutralizing mAb from a SARS survivor. a-b,** Binding of a panel of mAbs isolated from a SARS-immune patient to the SARS-CoV-2 (a) or SARS-CoV (b) S glycoproteins expressed at the surface of ExpiCHO cells (symbols are means of duplicates from one experiment). **c-d,** Affinity measurement of S309 full-length IgG1 and Fab for SARS-CoV-2 and SARS-CoV S<sup>B</sup> domains measured using biolayer interferometry. **e,** Neutralization of SARS-CoV-2-MLV, SARS-CoV-MLV (bearing S from various isolates) and other sarbecovirus isolates by mAb S309. **f,** Neutralization of authentic SARS-CoV-2 (strain n-CoV/USA\_WA1/2020) by mAbs as measured by a focus-forming assay on Vero E6 cells. **(e-f)** mean $\pm$ SD (e) or means (f) of duplicates are shown. One representative out of two experiments is shown.



**Figure 3**

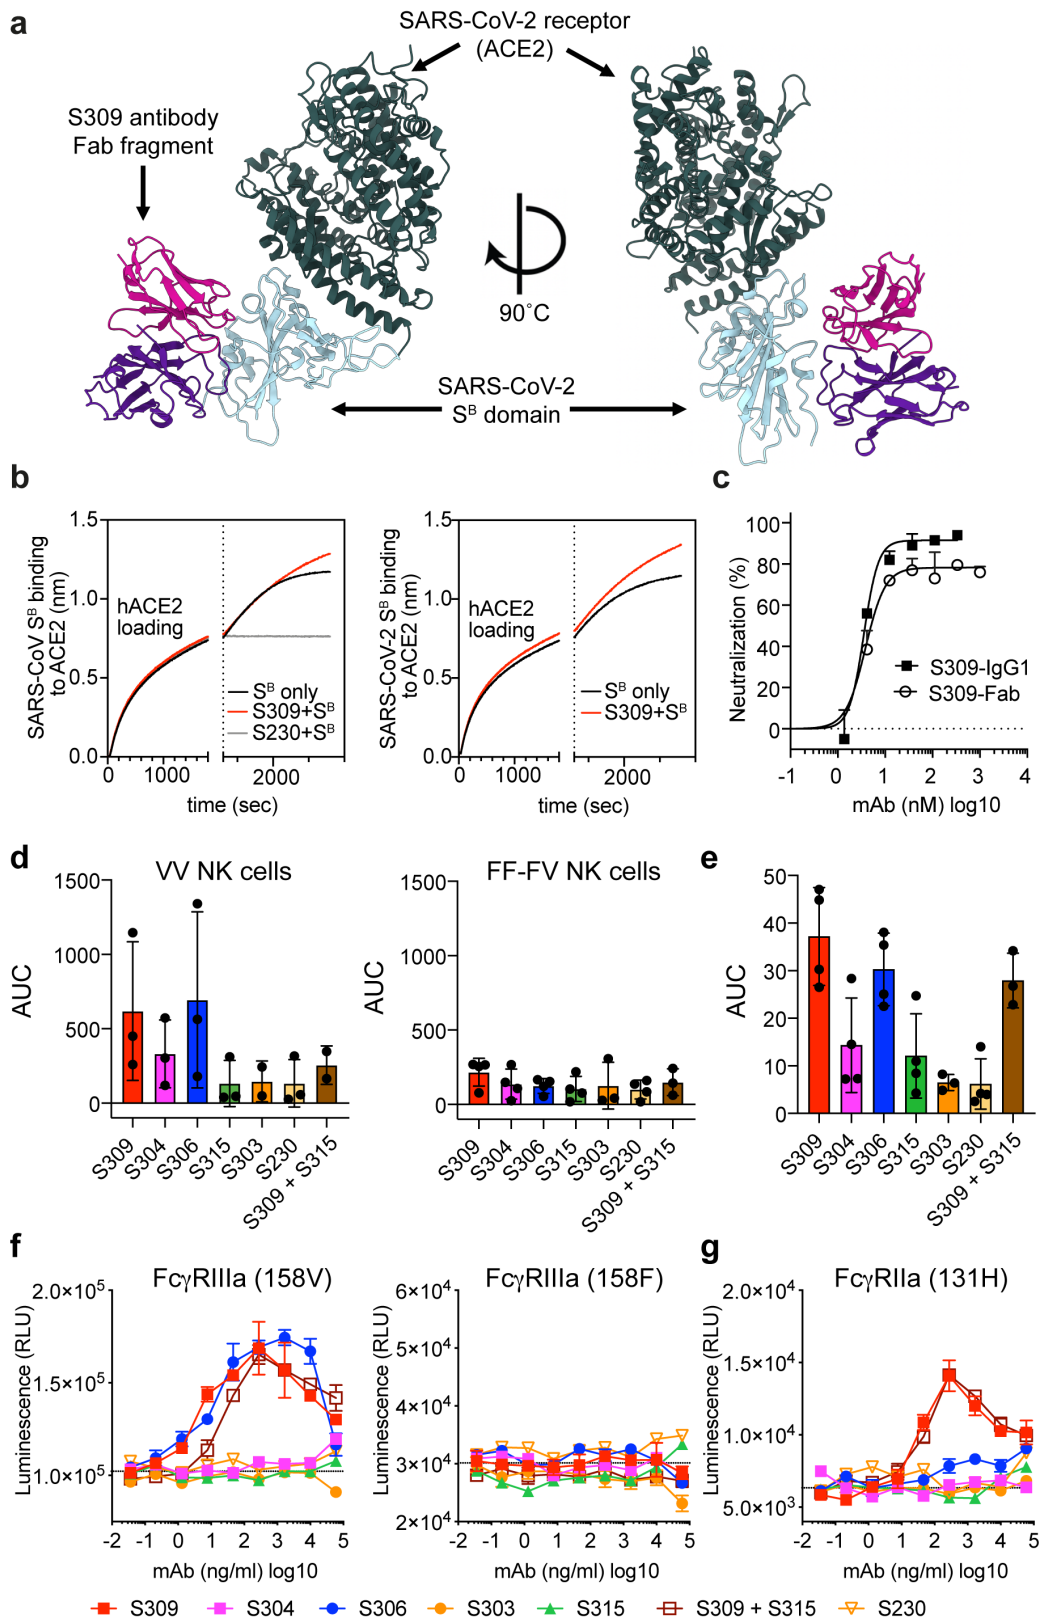

**Figure 3: Mechanism of neutralization of S309 mAb.** See next page for caption

**Figure 3: Mechanism of neutralization of S309 mAb.** **a-b**, Ribbon diagrams of S309 and ACE2 bound to SARS-CoV-2 S<sup>B</sup>. This composite model was generated using the SARS-CoV-2 S/S309 cryoEM structure reported here and a crystal structure of SARS-CoV-2 S bound to ACE2<sup>16</sup>. **c**, Competition of S309 or S230 mAbs with ACE2 to bind to SARS-CoV S<sup>B</sup> (left panel) and SARS-CoV-2 S<sup>B</sup> (right panel). ACE2 was immobilized at the surface of biosensors before incubation with S<sup>B</sup> domain alone or S<sup>B</sup> precomplexed with mAbs. The vertical dashed line indicates the start of the association of mAb-complexed or free S<sup>B</sup> to solid-phase ACE2. **d**, Neutralization of SARS-CoV-MLV by S309 IgG1 or S309 Fab, plotted in nM (means  $\pm$ SD is shown, one out of two experiments is shown). **e**, mAb-mediated ADCC using primary NK effector cells and SARS-CoV-2 S-expressing ExpiCHO as target cells. Bar graph shows the average area under the curve (AUC) for the responses of 3-4 donors genotyped for their Fc $\gamma$ R11a (mean $\pm$ SD, from two independent experiments). **f**, Activation of high affinity (V158) or low affinity (F158) Fc $\gamma$ R11a was measured using Jurkat reporter cells and SARS-CoV-2 S-expressing ExpiCHO as target cells (one experiment, one or two measurements per mAb). **g**, mAb-mediated ADCP using Cell Trace Violet-labelled PBMCs as phagocytic cells and PKF67-labelled SARS-CoV-2 S-expressing ExpiCHO as target cells. Bar graph shows the average area under the curve (AUC) for the responses of four donor (mean $\pm$ SD, from two independent experiments). **h**, Activation of Fc $\gamma$ R11a measured using Jurkat reporter cells and SARS-CoV-2 S-expressing ExpiCHO as target cells (one experiment, one or two measurements per mAb).



# Figure 4

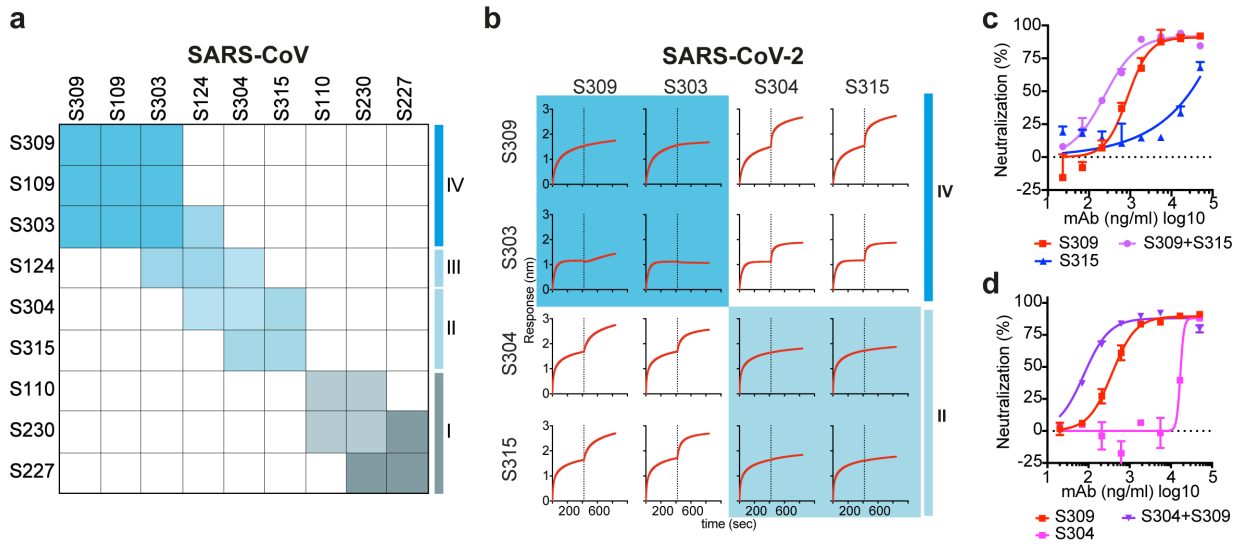

**Figure 4: MAb cocktails enhance SARS-CoV-2 neutralization.** **a**, Heat map showing the competition of mAb pairs for binding to the SARS-CoV S<sup>B</sup> domain as measured by biolayer interferometry (as shown in Extended Data Fig. 9). **b**, Competition of mAb pairs for binding to the SARS-CoV-2 S<sup>B</sup> domain. **c-d**, Neutralization of SARS-CoV-2-MLV by S309 combined with an equimolar amount of S304 or S315 mAbs. For mAb cocktails the concentration on the x axis is that of the individual mAbs.

**Table 1:** Characteristics of the antibodies described in this study. VH and VL % identity refers to V gene identity compared to germline (IMGT).

| mAb  | Blood sample date | VH (% identity) | HCDR3 Length | HCDR3 sequence        | VL (% identity) | LCDR3 sequence | SARS-CoV | SARS-CoV-2 | Specificity |
|------|-------------------|-----------------|--------------|-----------------------|-----------------|----------------|----------|------------|-------------|
| S110 | 2004              | VH3-30 (96.88)  | 18           | AKDRFQFARSWYGDYFDY    | VK2-30 (96.60)  | MQGTHWPPT      | +        | +          | RBD/non-RBD |
| S124 | 2004              | VH2-26 (98.28)  | 17           | ARINTAAYDYDSTTFDI     | VK1-39 (98.57)  | QQSYSTPPT      | +        | +          | RBD         |
| S109 | 2004              | VH3-23 (93.75)  | 19           | ARLESATQPLGYFFYGM DV  | VL3-25 (97.85)  | HSADISATSWV    | +        | -          | RBD         |
| S111 | 2004              | VH3-30 (95.14)  | 16           | ARDIRHLIVVSDMDV       | VK2-30 (98.30)  | MQGTHWPPT      | +        | -          | RBD         |
| S127 | 2004              | VH3-30 (96.53)  | 18           | AKDLFGYCRSTSCESLDD    | VK1-9 (98.92)   | QQLNNYPLT      | +        | -          | RBD         |
| S215 | 2004              | VH3-30 (90.28)) | 16           | ARETRHYSHGLNWFDP      | VK3-15 (98.92)  | QQYNNWPTT      | +        | -          | RBD         |
| S217 | 2004              | VH3-49 (95.58)  | 8            | SWIHRIVS              | VK1-33 (98.21)  | QQYDNLPT       | +        | -          | RBD         |
| S218 | 2004              | VH3-30 (93.40)  | 16           | ARDVKGHIVVMTSLDY      | VK2-30 (97.62)  | MQGTHWPPT      | +        | -          | RBD         |
| S219 | 2004              | VH1-58(92.01)   | 18           | AAEMATIQNYYYYGMDV     | VK1-39 (95.34)  | QQSYSTPPT      | +        | -          | RBD         |
| S222 | 2006              | VH1-2 (91.67)   | 15           | ARGDVPVGTGWVDF        | VK1-39 (92.47)  | QQSLSMVT       | +        | -          | RBD         |
| S223 | 2006              | VH3-30 (95.14)  | 19           | ATVSVEGYTSGWYLGTLDF   | VK3-15 (98.21)  | QQYNNWPGT      | +        | -          | RBD         |
| S224 | 2006              | VH1-18 (90.97)  | 15           | ARQSHSTRGGWHFSP       | VK1-39 (95.70)  | QQSYVPTY       | +        | -          | RBD         |
| S225 | 2006              | VH3-9 (96.18)   | 20           | AKDISLVFWSVPPRNGMDV   | VK1-39 (98.57)  | QQSYSSPLT      | +        | -          | RBD         |
| S226 | 2006              | VH3-30 (89.61)  | 18           | ARDSSWQSTGWPINWFDR    | VK3-11 (96.11)  | QQRSNWPPT      | +        | -          | RBD         |
| S227 | 2006              | VH3-23 (95.14)  | 12           | ASPLRNYGDLLY          | VK1-5 (96.06)   | QQYNSYSWT      | +        | -          | RBD         |
| S228 | 2006              | VH3-30 (96.53)  | 16           | ARDLQMRVVVSNFYD       | VK2D-30 (99.32) | MQATHWPPT      | +        | -          | RBD         |
| S230 | 2006              | VH3-30 (90.97)  | 20           | VTQRDNRSRDYFPHYHDM DV | VK2-30 (97.62)  | MQGSHWPPT      | +        | -          | RBD         |
| S231 | 2006              | VH3-30 (90.62)  | 17           | ARDDNLDHRWPLRLGGY     | VK2-30 (94.56)  | MQGAHWPPT      | +        | -          | RBD         |
| S237 | 2006              | VH3-21 (96.53)  | 11           | ARGFERYYFDS           | VL1-44 (96.84)  | VAWDDILNAV     | +        | -          | RBD         |
| S309 | 2013              | VH1-18 (97.22)  | 20           | ARDYTRGAWFGESLIGGFDN  | VK3-20 (97.52)  | QQHDTSLT       | +        | +          | RBD         |
| S315 | 2013              | VH3-7 (97.92)   | 17           | ARDLWWNDQAHHYGM DV    | VL3-25 (97.57)  | QSADSSGT       | +        | +          | RBD         |
| S303 | 2013              | VH3-23 (90.28)  | 17           | ARERDDIFPMGLNAFDI     | VK1-5 (97.49)   | QQYDTYSWT      | +        | +          | RBD         |
| S304 | 2013              | VH3-13 (97.89)  | 14           | ARGDSSGYYYYFDY        | VK1-39 (93.55)  | QQSYVSPTYT     | +        | +          | RBD         |
| S306 | 2013              | VH1-18 (95.49)  | 16           | ASDYFDSSGYHHSFDY      | VK3-11 (98.92)  | QQRSNWPPGCS    | +        | +          | non-RBD     |
| S310 | 2013              | VH1-69 (92.71)  | 19           | ATRTYDSSGYRYYYYGLDV   | VL2-23 (97.57)  | CSYAGSDTVI     | +        | +          | non-RBD     |

**Table 2. CryoEM data collection and refinement statistics.**

|                                                     | SARS-CoV-2<br>S + S309<br>(closed) | SARS-CoV-2 S<br>+ S309<br>(one S <sup>B</sup> open) |
|-----------------------------------------------------|------------------------------------|-----------------------------------------------------|
| <b>Data collection and processing</b>               |                                    |                                                     |
| Magnification                                       | 130,000                            | 130,000                                             |
| Voltage (kV)                                        | 300                                | 300                                                 |
| Electron exposure (e <sup>-</sup> /Å <sup>2</sup> ) | 70                                 | 70                                                  |
| Defocus range (µm)                                  | 0.5-3.0                            | 0.5-3.0                                             |
| Pixel size (Å)                                      | 0.525                              | 0.525                                               |
| Symmetry imposed                                    | C3                                 | C1                                                  |
| Final particle images (no.)                         | 168,449                            | 119,608                                             |
| Map resolution (Å)                                  | 3.3                                | 3.7                                                 |
| FSC threshold                                       | 0.143                              | 0.143                                               |
| Map sharpening <i>B</i> factor (Å <sup>2</sup> )    | -91                                | -69                                                 |
| <b>Validation</b>                                   |                                    |                                                     |
| MolProbity score                                    | 0.91                               |                                                     |
| Clashscore                                          | 0.9                                |                                                     |
| Poor rotamers (%)                                   | 0.1                                |                                                     |
| Ramachandran plot                                   |                                    |                                                     |
| Favored (%)                                         | 97.24                              |                                                     |
| Allowed (%)                                         | 99.91                              |                                                     |
| Disallowed (%)                                      | 0.09                               |                                                     |
| EMRinger Score                                      | 2.58                               |                                                     |

**Table 3. X-ray data collection and refinement statistics.**

|                                      | Fab S309                         |
|--------------------------------------|----------------------------------|
| <b>Data collection</b>               |                                  |
| Space group                          | P4 <sub>1</sub> 2 <sub>1</sub> 2 |
| Cell constants                       |                                  |
| a,b,c (Å)                            | 132.6, 132.6, 301.2              |
| $\alpha,\beta,\gamma$ (°)            | 90, 90, 90                       |
| Wavelength (Å)                       | 0.9812                           |
| Resolution (Å)                       | 68.6 - 3.3 (3.48 - 3.30)         |
| Rmerge                               | 18 (75)                          |
| I/ $\sigma$ (I)                      | 13.2 (2)                         |
| CC(1/2)                              | 99.0 (33)                        |
| Completeness (%)                     | 99.4 (99.0)                      |
| Redundancy                           | 12                               |
| <b>Refinement</b>                    |                                  |
| Resolution (Å)                       | 68.6 - 3.3                       |
| Unique reflections                   | 41,395                           |
| Rwork/Rfree (%)                      | 20.5 / 23.8                      |
| Number of protein atoms              | 8,347                            |
| Number of water atoms                | 0                                |
| R.m.s.d. bond lengths (Å)            | 0.06                             |
| R.m.s.d. bond angles (°)             | 1.45                             |
| Favored Ramachandran residues (%)    | 96                               |
| Allowed Ramachandran residues (%)    | 3.54                             |
| Disallowed Ramachandran residues (%) | 0.46                             |

<sup>1</sup>Numbers in parentheses refer to outer resolution shell
